# Supplementary material
Source: publisher figshare collection journal article supplement (https://acs.figshare.com/ndownloader/files/5739684)
Supplement: Supplementary file 1 [file 5739684]

## Supporting Information

### Synthesis-Based Approach Toward Direct Sandwich Immunoassay for Ciguatoxin CTX3C

Hiroki Oguri,<sup>†</sup> Masahiro Hirama,<sup>\*,‡</sup> Takeshi Tsumuraya,<sup>‡</sup> Ikuo Fujii,<sup>\*,‡</sup> Megumi Maruyama,<sup>†</sup> Hisatoshi Uehara,<sup>†</sup> and Yoko Nagumo<sup>†</sup>. Department of Chemistry, Graduate School of Science, Tohoku University, Sendai 980-8578, Japan

Biomolecular Engineering Research Institute, Osaka 565-0874, Japan

hirama@ykbsc.chem.tohoku.ac.jp; fujii@beri.or.jp

**General methods:** Safety precautions for highly toxic materials should be used when working with toxins such as CTX3C; all operations should be carried out in the hood and protective gloves, glasses, and mask should be worn. All reactions sensitive to air were carried out under argon or nitrogen under anhydrous conditions, unless otherwise noted. Tetrahydrofuran (THF) was distilled from sodium/benzophenone, dichloromethane ( $\text{CH}_2\text{Cl}_2$ ), 1,2-dichloroethane and toluene from calcium hydride, and DMF from calcium hydride under reduced pressure. Phosphate buffered saline (PBS:  $\text{Na}_2\text{HPO}_4\text{-KH}_2\text{PO}_4$ , pH 7.4) was prepared by using Dulbecco's PBS powder (Wako Pure Chemical Industries, LTD). All other reagents were used as supplied unless otherwise stated. Analytical thin-layer chromatography (TLC) was performed using E. Merck Silica gel 60 F254 precoated plates. Column chromatography was performed using 100-210  $\mu\text{m}$  Silica Gel 60N (Kanto Chemicals Co., Inc.), and 40-50  $\mu\text{m}$  Silica Gel 60N (Kanto Chemicals Co., Inc.) was used for flash column chromatography.  $^1\text{H}$  NMR were recorded on a Varian INOVA 500 (500 MHz) spectrometer and referenced to residual  $\text{CHCl}_3$  [ $^1\text{H}$ -NMR (7.26)] as an internal standard. Matrix-assisted laser desorption/ionization time-of-flight mass spectrometry (MALDI-TOF MS) spectra were recorded on a PerSeptive Biosystem Voyager DE STR SI-3 instrument.

**Synthesis of 8:** The ABCDE ring fragment (**5**) was synthesized as reported previously.<sup>1</sup> A solution of **5** (6.2 mg, 8.2  $\mu\text{mol}$ ) in 1,2-dichloroethane (2 ml) and  $\text{H}_2\text{O}$  (100  $\mu\text{l}$ ) was treated with DDQ (8.0 mg, 35.2  $\mu\text{mol}$ ), and stirred for 5 h at room temperature. The mixture was cooled to 0  $^\circ\text{C}$ , diluted with  $\text{Et}_2\text{O}$  and saturated aqueous  $\text{Na}_2\text{S}_2\text{O}_3$ . The organic layer was separated and washed with  $\text{H}_2\text{O}$ . After being dried over  $\text{Na}_2\text{SO}_4$ , the mixture was concentrated under reduced pressure. The residue

was purified by silica gel column chromatography to give 2.3 mg (3.5  $\mu$ mol, 42%) of **6** and 2.8 mg (recovered 45%) of **5**. Multiple runs were used to generate the larger amount. A solution of **6** (4.0 mg, 6.0  $\mu$ mol) in THF (2 ml) was treated with TBAF (18  $\mu$ L, 1.0 M in THF, 18  $\mu$ mol) and stirred for 30 min at room temperature. The reaction mixture was concentrated under reduced pressure. The residue was purified by silica gel column chromatography to give 2.5 mg (5.9  $\mu$ mol, 98%) of **7**. A solution of **7** (2.8 mg, 6.6  $\mu$ mol) in DMF (300  $\mu$ L) was treated with methyl 3,3-dimethoxypropionate (10  $\mu$ L, 70  $\mu$ mol), TsOH $\cdot$ H<sub>2</sub>O (0.5 mg, 3  $\mu$ mol). After stirring for 1.5 h at room temperature, toluene (1 ml) was added. The reaction mixture was concentrated under reduced pressure (120 mbar/hPa) and kept the pressure for 1 h. The residue was purified by silica gel column chromatography to give 1.9 mg of **8** (3.8  $\mu$ mol, 57%) as a diastereomeric mixture (27*R*:27*S* = 2:1).

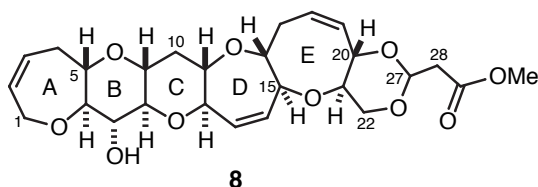

**8:** <sup>1</sup>H-NMR (500 MHz, CDCl<sub>3</sub>)  $\delta$  1.53 (1H, m, H10<sub>ax</sub>), 2.28 (1H, dt, *J* = 12.0, 4.5 Hz, H10<sub>eq</sub>), 2.32 (1H, m, H17), 2.37 (1H, m, H4), 2.62 (1H, m, H4), 2.64 (1H, m, H17), 2.67 (1H, dd, *J* = 15.5, 5.5 Hz, H28<sub>major</sub>), 2.69 (1H, dd, *J* = 15.5, 5.5 Hz, H28<sub>major</sub>), 2.84 (1H, dd, *J* = 14.5, 6.0 Hz, H28<sub>minor</sub>), 2.91 (1H, dd, *J* = 14.5, 6.0 Hz, H28<sub>minor</sub>), 3.01 (1H, t, *J* = 9.0 Hz, H8), 3.11 (1H, ddd, *J* = 11.0, 9.0, 4.5 Hz, H9), 3.22-3.26 (2H, m, H5, H11), 3.34 (1H, m, H21<sub>major</sub>), 3.43 (1H, t, *J* = 10.5 Hz, H22<sub>major</sub>), 3.44 (1H, m, H21<sub>minor</sub>), 3.58-3.64 (3H, m, H16, H7, H6), 3.64 (1H, m, H22<sub>minor</sub>), 3.70 (3H, s, OMe), 3.80 (1H, ddd, *J* = 9.0, 4.0, 2.5 Hz, H12), 3.94 (1H, dd, *J* = 15.5, 6.0 Hz, H22<sub>minor</sub>), 4.02 (1H, ddt, *J* = 15.0, 4.0, 2.5 Hz, H1), 4.11 (1H, dd, *J* = 10.5, 5.5 Hz, H22<sub>major</sub>), 4.12 (1H, m, H15), 4.24 (1H, m, H20<sub>major</sub>), 4.32 (1H, dd, *J* = 15.0, 6.0 Hz, H1), 4.48 (1H, m, H20<sub>minor</sub>), 4.93 (1H, t, *J* = 5.5 Hz, H27<sub>major</sub>), 5.41 (1H, t, *J* = 6.0 Hz, H27<sub>minor</sub>), 5.63 (1H, brdt, *J* = 12.5, 2.5 Hz, H14), 5.70 (1H, m, H13), 5.73 (1H, dd, *J* = 10.5, 5.0 Hz, H19), 5.80 (1H, m, H18), 5.83 (1H, m, H3), 5.92 (1H, m, H2). MALDI-TOF MS: Calcd for C<sub>26</sub>H<sub>34</sub>O<sub>10</sub>Na 529.205 (M+Na<sup>+</sup>); Found 529.185.

**Preparation of KLH-conjugate 9:** A solution of **8** (2.5 mg, 4.9  $\mu$ mol) in *t*-BuOH (0.5 ml) and H<sub>2</sub>O (125  $\mu$ L) was treated with LiOH $\cdot$ H<sub>2</sub>O (2.8 mg, 68  $\mu$ mol) and stirred for 1 h at room temperature. The reaction mixture was acidified with KHSO<sub>4</sub> (18.6 mg, 136  $\mu$ mol) and diluted with EtOAc (40 ml). After being dried over MgSO<sub>4</sub>, the mixture was concentrated under reduced pressure to give **3**,

which was dissolved in DMF (200  $\mu$ l) and treated with *N*-hydroxysuccine imide (5.6 mg, 49  $\mu$ mol) and EDC·HCl (4.8 mg, 25  $\mu$ mol). The mixture was stirred for 12 h at room temperature and diluted with EtOAc (40 ml). The organic layer was washed with H<sub>2</sub>O and dried over Na<sub>2</sub>SO<sub>4</sub>. The mixture was concentrated under reduced pressure, and the resulting activated ester was dissolved in DMF (100  $\mu$ l), which was used for conjugation with carrier proteins. To a solution of KLH (5.0 mg) in PBS (1.0 ml) was added the DMF solution of the activated ester (50  $\mu$ l, ca. 2.4  $\mu$ mol). After 24 hour, the KLH conjugate **9** was dialyzed against PBS (pH 7.4, 1000 ml x 3).

**Preparation of BSA-conjugate 10:** To a solution of BSA (5.0 mg) in PBS (1.0 ml) was added the DMF solution of the activated ester (50  $\mu$ l, ca. 2.4  $\mu$ mol). After 24 hour, the BSA conjugate **10** was dialyzed against PBS (pH 7.4, 1000 ml x 3). MALDI-TOF MS analysis revealed approximately 8 haptens per molecule of BSA.

**Synthesis of 12:** The IJKLM ring fragment (**11**) was synthesized as reported previously.<sup>2</sup> A solution of **11** (4.2 mg, 9.0  $\mu$ mol) in CH<sub>2</sub>Cl<sub>2</sub> (300  $\mu$ l) was treated with methyl 3,3-dimethoxypropionate (10  $\mu$ l, 70  $\mu$ mol), TsOH·H<sub>2</sub>O (0.5 mg, 3  $\mu$ mol). After stirring for 1.5 h at room temperature, toluene (1 ml) was added. The reaction mixture was concentrated under reduced pressure (120 mbar/hPa) and kept the pressure for 1 h. The residue was diluted with EtOAc and washed with NaHCO<sub>3</sub> and brine. After being dried over MgSO<sub>4</sub>, the mixture was concentrated under reduced pressure. The residue was purified by silica gel column chromatography to give 4.7 mg of **12** (8.5  $\mu$ mol, 94%) as a diastereomeric mixture (30*R*:30*S* = 1:3).

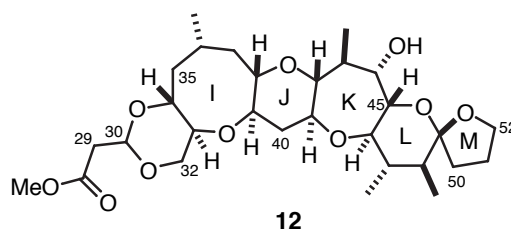

**12:** <sup>1</sup>H-NMR (500 MHz, CDCl<sub>3</sub>)  $\delta$  0.89 (3H, d, *J* = 6.5Hz, Me48), 1.03 (3H, d, *J* = 6.0Hz, Me47), 1.06 (3H, d, *J* = 7.0Hz, Me36), 1.15 (3H, d, *J* = 7.5Hz, Me43), 1.39 (1H, brq, *J* = 11.5Hz, H40ax), 1.50~1.62 (4H, m, H48, H37, H35, H37), 1.77-1.88 (4H, m, H51, H50, H36, H35, H37), 1.92-1.97 (2H, m, H50, H51), 2.02 (1H, qdd, *J* = 7.5, 5.0, 3.0Hz, H43), 2.21 (brdt, *J* = 11.5, 5.0Hz, H40eq), 2.62 (2H, *J* = 5.0Hz, H29) 2.85(1H, dd, *J* = 9.5, 5.0Hz, H42), 2.96 (1H, brtd, *J* = 9.5, 3.0Hz, H38), 3.13 (1H, brddd, *J* = 11.5, 9.5, 5.0Hz, H39), 3.24 (1H, t, *J* = 9.5Hz, H46), 3.29 (1H, brtd, *J* = 9.5, 4.5Hz, H33), 3.32 (1H, t, *J* = 9.5Hz, H32), 3.41 (1H, brtd, *J* = 9.5, 3.0Hz, H34), 3.64 (1H, dd, *J* =

9.5, 1.5 Hz, H45), 3.69 (3H, s, OMe), 3.68-3.72 (2H, m, H41, H44), 3.78 (1H, brq,  $J = 7.5\text{ Hz}$ , H52), 3.88 (1H, m, H52), 4.01 (1H, dd,  $J = 9.5, 4.5\text{ Hz}$ , H32), 4.87 (1H, t,  $J = 5.0\text{ Hz}$ , H30). MALDI-TOF MS: Calcd for  $\text{C}_{29}\text{H}_{46}\text{O}_{10}\text{Na}$  577.299 ( $\text{M}+\text{Na}^+$ ); Found 577.244.

**Preparation of KLH-conjugate 13:** A solution of **12** (4.7 mg, 8.5  $\mu\text{mol}$ ) in *t*-BuOH (0.5 ml) and  $\text{H}_2\text{O}$  (125  $\mu\text{l}$ ) was treated with  $\text{LiOH}\cdot\text{H}_2\text{O}$  (2.8 mg, 68  $\mu\text{mol}$ ) and stirred for 1 h at room temperature. The reaction mixture was acidified with  $\text{KHSO}_4$  (18.6 mg, 136  $\mu\text{mol}$ ) and diluted with EtOAc (10 ml). After being dried over  $\text{MgSO}_4$ , the mixture was concentrated under reduced pressure to give **3**, which was dissolved in DMF (200  $\mu\text{l}$ ) and treated with *N*-hydroxysuccine imide (9.7 mg, 85  $\mu\text{mol}$ ) and EDC·HCl (8.1 mg, 43  $\mu\text{mol}$ ). The mixture was stirred for 12 h at room temperature and diluted with EtOAc (10 ml). The organic layer was washed with  $\text{H}_2\text{O}$  and dried over  $\text{Na}_2\text{SO}_4$ . The mixture was concentrated under reduced pressure, and the activated ester was dissolved in DMF (100  $\mu\text{l}$ ), which was used for conjugation with carrier proteins. To a solution of KLH (7.0 mg) in PBS (2.0 ml) was added the DMF solution of the activated ester (50  $\mu\text{l}$ , ca. 4.2  $\mu\text{mol}$ ). After 24 h, the KLH conjugate **13** was dialyzed against PBS (pH 7.4, 1000 ml x 3).

**Preparation of BSA-conjugate 14:** To a solution of BSA (7.0 mg) in PBS (2.0 ml) was added the DMF solution of the activated ester (50  $\mu\text{l}$ , ca. 4.2  $\mu\text{mol}$ ). After 24 hour, the BSA conjugate **14** was dialyzed against PBS (pH 7.4, 1000 ml x 3). MALDI-TOF MS analysis revealed approximately 10 haptens per molecule of BSA.

## References

1. Maruyama, M.; Inoue, M.; Oishi, T.; Oguri, H.; Ogasawara, N.; Shindo, Y.; Hiramata, M. *Tetrahedron* **2002**, 58, 1835.
2. Uehara, H.; Oishi, T.; Inoue, M.; Shoji, M.; Nagumo, Y.; Kosaka, M.; Le Brazidec, J.-Y.; Hiramata, M. *Tetrahedron* **2002**, 58, 6493.
